# Supplementary material for: Synthetic microparticles conjugated with VEGF165 improve the survival of endothelial progenitor cells via microRNA-17 inhibition
Source: PubMed Central journal article supplement (PMC5622042; doi:10.1038/s41467-017-00746-7), 2017-09-29
Supplement: 41467_2017_746_MOESM1_ESM.pdf [file 41467_2017_746_MOESM1_ESM.pdf]

# SI GUIDE

File Name: Supplementary Information

Description: Supplementary Figures, Supplementary Tables and Supplementary References.

File Name: Supplementary Data 1

Description: Downregulated miRNAs in the microarray

File Name: Supplementary Data 2

Description: Upregulated miRNAs in the microarray

File Name: Peer Review File

Description:

**Supplementary Table 1.** Antibodies used for experiments

| <b>Antibody</b>                         | <b>Dilution</b>                           | <b>Reference</b> | <b>Supplier</b>           | <b>Fixation</b> |
|-----------------------------------------|-------------------------------------------|------------------|---------------------------|-----------------|
| Mouse anti-his tag<br>(biotinylated)    | See Text <sup>o</sup>                     | BAM050           | R&D Systems               | N/A             |
| Mouse anti-VEGF                         | 10 $\mu$ l/test <sup>o</sup> <sup>□</sup> | IC2931P          | R&D Systems               | N/A             |
| Mouse anti-VEGF Receptor 2              | 1/50 <sup>♦</sup>                         | ab9530           | Abcam                     | 4% PFA          |
| Rabbit anti-human p-Flk-1<br>(Tyr 1175) | 1/1000 <sup>o</sup>                       | sc-101819        | Santa Cruz                | N/A             |
| Rabbit anti-human p-Flk-1<br>(Tyr 1214) | 1/1000 <sup>o</sup>                       | sc-101820        | Santa Cruz                | N/A             |
| Rabbit anti-CDKN1A                      | 1/50 <sup>♦</sup> <sup>□</sup>            | sc-397           | Santa Cruz                | 4% PFA          |
| Rabbit anti-ZO1                         | 1/200 <sup>♦</sup>                        | 61-7300          | Invitrogen                | 4% PFA          |
| Mouse anti-VE-cadherin                  | 1/50 <sup>♦</sup>                         | sc-9989          | Santa Cruz                | 4% PFA          |
| Alexa Fluor 555 anti mouse              | 1/200 <sup>♦</sup>                        | A21422           | Molecular<br>Probes       | 4% PFA          |
| Alexa Fluor 488 anti rabbit             | 1/200 <sup>♦</sup>                        | A11034           | Molecular<br>Probes       | 4% PFA          |
| Cy3 anti rabbit                         | 1/100 <sup>♦</sup>                        | 111-165-144      | Jackson<br>Immunoresearch | 4% PFA          |
| DAPI                                    | 2 $\mu$ g/ml <sup>♦</sup>                 | D9542            | Sigma                     | 4% PFA          |

<sup>o</sup>Microparticle preparation/characterization (for the amount of antibodies, please, see the text), <sup>♦</sup>immunofluorescence, <sup>o</sup>WB, and <sup>□</sup>flow cytometry.

**Supplementary Table 2.** Primers used for quantitative RT-PCR

| <b>Gene/RNA</b> | <b>Forward sequence</b> | <b>Reverse sequence</b> |
|-----------------|-------------------------|-------------------------|
| SNORD48         | ATGATGACCCCAGGTA ACTCT  | GCTGCGGTGATGGCAT        |
| 5S rRNA         | GATCTCGTCTGATCTCGGAAG   | GGTATTCCCAGGCGGTCT      |
| hsa-miR-17      | CAAAGTGCTTACAGTGCAGGTAG | Universal primer        |
| hsa-miR-217     | TACTGCATCAGGAACTGATTGGA | Universal primer        |
| hsa-miR-222     | AGCTACATCTGGCTACTGGGT   | Universal primer        |
| <i>U6</i>       | TCGGCAGCACATATACTAA     | GAATTTGCGTGT CATCCT     |
| <i>EIF4G2</i>   | GAGCCATTGCTAAGATCAAG    | CTAATCTAGGTCCC ACTGTC   |
| <i>GRM7</i>     | TGAACTCAATGTCCAGAAAC    | CTGTTTGGGTCTACGTTTTC    |
| <i>SATL1</i>    | GATAGCCATCACAACTCAATG   | CTGTAAACCTGAAGAGATGC    |
| <i>ZNF652</i>   | GTTTCAGTACAAGTACCAGC    | AGATAAAGGGTTTCTCTCCAG   |
| <i>CCND1</i>    | GCCTCTAAGATGAAGGAGAC    | CCATTTGCAGCAGCTC        |
| <i>CDKN1A</i>   | CAGCATGACAGATTTCTACC    | CAGGGTATGTACATGAGGAG    |
| <i>E2F1</i>     | CTGATGAATATCTGTACTACGC  | CTTTGATCACCATAACCATCTG  |
| <i>SIPR1</i>    | CAGACAAGCAAAACAAAGTG    | CATCAACAAAAGTGCCAAAG    |
| <i>HSPB1</i>    | CTTCACGCGGAAATACAC      | ATGGTGATCTCGTTGGAC      |
| <i>JAK1</i>     | GAAAAACAAGATCCGGGAAG    | TCCATTTTCTTGTTGTCCTG    |
| <i>MAPK9</i>    | CCTGAAGATCCTTGACTTTG    | ATCAACGTTCTCTTTGTAGC    |
| <i>CASP3</i>    | AGCGAATCAATGGACTCT      | TTTCTGAATGTTCCCTGAG     |
| <i>CASP9</i>    | TTGTTTCATCTCCTGCTTAGA   | TCTGGTTTGCGAATCTCT      |

**Supplementary Table 3.** The individual results for the top 20 most differentially expressed known mRNA genes detected by mRNA sequencing

| Gene ID     | Gene     | Locus                      | Ctrl FPKM | Transf FPKM | Log2_FC  | q Value     |
|-------------|----------|----------------------------|-----------|-------------|----------|-------------|
| XLOC_046949 | FAM65B   | 6:24797548-25057301        | 8.542     | 0.008       | -10.0525 | 0.000675141 |
| XLOC_004640 | CD84     | 1:160506862-160549306      | 0.038     | 6.274       | 7.35534  | 0.000675141 |
| XLOC_037760 | C3orf65  | 3:185360843-185542844      | 1.108     | 0.011       | -6.60622 | 0.0232187   |
| XLOC_038309 | CELSR3   | 3:48673901-48700348        | 20.027    | 0.220       | -6.50982 | 0.000675141 |
| XLOC_050299 | -        | 7:64435760-64435947        | 2.697     | 134.302     | 5.63773  | 0.0165759   |
| XLOC_061341 | CDKL5    | X:18443702-18690229        | 1.548     | 0.037       | -5.38025 | 0.000675141 |
| XLOC_054281 | MTND4P15 | 9:94793357-94877672        | 0.055     | 2.100       | 5.26693  | 0.0405763   |
| XLOC_031778 | -        | 2:96497268-96500294        | 0.899     | 0.025       | -5.15123 | 0.0208843   |
| XLOC_047912 | SAMD3    | 6:130465459-130686570      | 0.034     | 1.084       | 5.00886  | 0.000675141 |
| XLOC_012270 | -        | 12:105877461-<br>105881171 | 2.088     | 0.075       | -4.80211 | 0.000675141 |
| XLOC_053059 | -        | 8:81397172-81397365        | 2.305     | 63.537      | 4.78454  | 0.0381035   |
| XLOC_036358 | GRM7     | 3:6532165-7783215          | 0.125     | 3.287       | 4.7208   | 0.000675141 |
| XLOC_012269 | -        | 12:105875536-<br>105877390 | 1.788     | 0.070       | -4.68055 | 0.00125545  |
| XLOC_018141 | FAM81A   | 15:59427112-59815748       | 0.233     | 0.009       | -4.65827 | 0.000675141 |
| XLOC_018244 | GLCE     | 15:69452922-69564549       | 903.080   | 36.124      | -4.64382 | 0.0133201   |
| XLOC_019972 | TMC5     | 16:19421817-19510435       | 0.992     | 0.046       | -4.43902 | 0.000675141 |
| XLOC_015426 | TMEM253  | 14:21484921-21572881       | 0.864     | 0.040       | -4.42957 | 0.0057667   |
| XLOC_016127 | -        | 14:86101873-86102316       | 0.182     | 3.837       | 4.39655  | 0.0497288   |
| XLOC_012926 | IFLTD1   | 12:25562226-25801513       | 1.360     | 0.065       | -4.39061 | 0.000675141 |
| XLOC_008587 | -        | 11:58345977-58346438       | 4.933     | 0.237       | -4.38203 | 0.0278032   |

Table of the 20 most differentially expressed mRNAs, with log fold change (Log2\_FC) between groups with Benjamini-Hochberg FDR corrected q-values. The list is sorted on Log2\_FC.

**Supplementary Table 4.** The individual results for the top 20 most differentially expressed isoforms detected by mRNA sequencing

| Isoform ID  | Gene    | Locus                  | Ctrl FPKM | Transf FPKM | Log2_FC  | q Value    |
|-------------|---------|------------------------|-----------|-------------|----------|------------|
| XLOC_019533 | ANPEP   | 15:90328119-90358633   | 1.34842   | 1.02E-155   | -515.306 | 0.0399145  |
| XLOC_015291 | COL4A1  | 13:110801317-111165380 | 106.989   | 4.68E-137   | -459.62  | 0.0385023  |
| XLOC_031368 | EFEMP1  | 2:56093101-56151274    | 13.6848   | 3.17E-130   | -433.962 | 0.0280797  |
| XLOC_009759 | EIF4G2  | 11:10804859-10830657   | 6.11E-97  | 88.4983     | 326.083  | 0.0494118  |
| XLOC_012686 | ANO2    | 12:5641034-6233936     | 1.98074   | 1.03E-82    | -273.339 | 0.0328669  |
| XLOC_037744 | PSMD2   | 3:183852825-184402546  | 1.80386   | 4.44E-65    | -214.627 | 0.0344827  |
| XLOC_030854 | SEPT2   | 2:242166678-242293442  | 1.05888   | 6.10E-65    | -213.4   | 0.0344827  |
| XLOC_017896 | THBS1   | 15:39873279-39891667   | 18.9287   | 1.72E-58    | -196.13  | 0.0265174  |
| XLOC_036170 | RPL3    | 22:39708886-39716394   | 4.37E-33  | 1.20503     | 107.765  | 0.0216794  |
| XLOC_047558 | EEF1A1  | 6:74225472-74280319    | 0.919699  | 3.48E-33    | -107.705 | 0.0344827  |
| XLOC_013317 | SMARCC2 | 12:56544579-56584068   | 3.13E-25  | 0.740708    | 80.9687  | 0.0494118  |
| XLOC_047558 | EEF1A1  | 6:74225472-74280319    | 1629.19   | 1.69E-19    | -73.0315 | 0.0313791  |
| XLOC_017114 | LTBP2   | 14:74964872-75079306   | 20.9293   | 1.56E-18    | -63.5379 | 0.0328669  |
| XLOC_009915 | CD59    | 11:33719806-33757991   | 1.06E-17  | 66.6759     | 62.4475  | 0.0297186  |
| XLOC_034040 | TGM2    | 20:36756858-36794980   | 1.19E-13  | 37.1242     | 48.1503  | 0.023296   |
| XLOC_017896 | THBS1   | 15:39873279-39891667   | 441.431   | 1.46E-09    | -38.1407 | 0.0328669  |
| XLOC_017896 | THBS1   | 15:39873279-39891667   | 824.637   | 3.68123     | -7.80743 | 0.0265174  |
| XLOC_033810 | RRBP1   | 20:17594321-17662940   | 0.220206  | 47.8513     | 7.76356  | 0.0425472  |
| XLOC_003088 | UBR4    | 1:19400999-19536770    | 11.2597   | 0.335811    | -5.06737 | 0.00335663 |
| XLOC_012270 | -       | 12:105877461-105881171 | 2.08817   | 0.0748493   | -4.80211 | 0.00335663 |

Table of the 20 most significantly differentially expressed isoforms, with log fold change (Log2\_FC) between groups with Benjamini-Hochberg FDR corrected q-values. The list is sorted on Log2\_FC.

**Supplementary Table 5.** The top 20 differentially expressed novel transcripts identified in mRNA sequencing

| <b>Novel Transcript ID</b> | <b>Closest Related Known Gene</b> | <b>Locus</b>           | <b>Ctrl</b> | <b>Transf FPKM</b> | <b>Log2_FC</b> | <b>q Value</b> |
|----------------------------|-----------------------------------|------------------------|-------------|--------------------|----------------|----------------|
| TCONS_00085720             | COL4A1                            | 13:110801317-111165380 | 106.989     | 4.6E-137           | -459.62        | 0.0385023      |
| TCONS_00052415             | EIF4G2                            | 11:10804859-10830657   | 6.11E-97    | 88.4983            | 326.083        | 0.0494118      |
| TCONS_00075943             | SMARCC2                           | 12:56544579-56584068   | 3.13E-25    | 0.740708           | 80.9687        | 0.0494118      |
| TCONS_00205680             | TGM2                              | 20:36756858-36794980   | 1.19E-13    | 37.1242            | 48.1503        | 0.023296       |
| TCONS_00099624             | THBS1                             | 15:39873279-39891667   | 824.637     | 3.68123            | -7.80743       | 0.0265174      |
| TCONS_00204501             | RRBP1                             | 20:17594321-17662940   | 0.220206    | 47.8513            | 7.76356        | 0.0425472      |
| TCONS_00085429             | ABCC4                             | 13:95672082-95983687   | 3.14261     | 0.159508           | -4.30026       | 0.00335663     |
| TCONS_00124039             | TBC1D10B                          | 16:30368421-30381585   | 1.43246     | 26.6936            | 4.21992        | 0.00335663     |
| TCONS_00206441             | ATP9A                             | 20:50213052-50385173   | 10.181      | 0.595275           | -4.09619       | 0.0164573      |
| TCONS_00032986             | SCD                               | 10:102106876-102124591 | 66.1694     | 4.37847            | -3.91766       | 0.0164573      |
| TCONS_00128759             | XAF1                              | 17:6658765-6678989     | 1.87214     | 24.5972            | 3.71573        | 0.0164573      |
| TCONS_00122809             | SMG1                              | 16:18814404-18937776   | 5.37056     | 0.411391           | -3.70649       | 0.00335663     |
| TCONS_00231057             | TMEM115                           | 3:50384760-50397041    | 2.25671     | 27.4838            | 3.60629        | 0.0344827      |
| TCONS_00228488             | RFTN1                             | 3:16306699-16555533    | 2.35405     | 28.302             | 3.58769        | 0.00605201     |
| TCONS_00271547             | SASH1                             | 6:148558720-148873186  | 16.0977     | 1.36713            | -3.55763       | 0.00335663     |
| TCONS_00020947             | DDAH1                             | 1:85731456-86044046    | 1.76149     | 20.2906            | 3.52594        | 0.0372105      |
| TCONS_00193475             | TGOLN2                            | 2:85545146-85555548    | 2.21071     | 24.8707            | 3.49186        | 0.0372105      |
| TCONS_00088299             | LGALS3                            | 14:55590827-55612126   | 2.5356      | 28.131             | 3.47176        | 0.0359069      |
| TCONS_00004639             | MAST2                             | 1:46252658-46501896    | 0.904814    | 9.65157            | 3.41507        | 0.0412828      |
| TCONS_00073957             | SLC38A1                           | 12:46576838-46663800   | 7.93558     | 0.752308           | -3.39894       | 0.0454058      |

Table of the 20 most differentially expressed novel transcripts, with log fold change (Log2\_FC) between groups with Benjamini-Hochberg FDR corrected q-values. The list is sorted on Log2\_FC.

**Supplementary Table 6.** A list of potentially significant GO (Biological process) terms according to mRNA sequencing results

| GO ID      | Term                                                       | Annotated | Significant | Expected | Rank in ClassicFisher | CI Fisher | ClassicKS | ElimKS  |
|------------|------------------------------------------------------------|-----------|-------------|----------|-----------------------|-----------|-----------|---------|
| GO:0019083 | Viral transcription                                        | 56        | 56          | 56       | 1                     | 1         | 0.00088   | 0.00088 |
| GO:0048596 | Embryonic camera-type eye morphogenesis                    | 12        | 12          | 12       | 2                     | 1         | 0.00238   | 0.00238 |
| GO:0045454 | Cell redox homeostasis                                     | 15        | 15          | 15       | 3                     | 1         | 0.00252   | 0.00252 |
| GO:0009653 | Anatomical structure morphogenesis                         | 418       | 418         | 418      | 4                     | 1         | 0.00166   | 0.00166 |
| GO:0006413 | Translational initiation                                   | 61        | 61          | 61       | 5                     | 1         | 0.00311   | 0.00311 |
| GO:0006809 | Nitric oxide biosynthetic process                          | 11        | 11          | 11       | 6                     | 1         | 0.00317   | 0.00317 |
| GO:0043624 | Cellular protein complex disassembly                       | 64        | 64          | 64       | 7                     | 1         | 0.00336   | 0.00336 |
| GO:0050792 | Regulation of viral process                                | 18        | 18          | 18       | 8                     | 1         | 0.00406   | 0.00406 |
| GO:0042558 | Pteridine-containing compound metabolic process            | 3         | 3           | 3        | 9                     | 1         | 0.00447   | 0.00447 |
| GO:0051289 | Protein homotetramerization                                | 11        | 11          | 11       | 10                    | 1         | 0.00469   | 0.00469 |
| GO:0003333 | Amino acid transmembrane transport                         | 7         | 7           | 7        | 11                    | 1         | 0.00496   | 0.00496 |
| GO:0090257 | Regulation of muscle system process                        | 22        | 22          | 22       | 12                    | 1         | 0.00525   | 0.00525 |
| GO:0033157 | Regulation of intracellular protein transport              | 41        | 41          | 41       | 13                    | 1         | 0.00527   | 0.00527 |
| GO:0007166 | Cell surface receptor signaling pathway                    | 472       | 472         | 472      | 14                    | 1         | 0.00595   | 0.00595 |
| GO:0051208 | Sequestering of calcium ion                                | 10        | 10          | 10       | 15                    | 1         | 0.00598   | 0.00598 |
| GO:0010557 | Positive regulation of macromolecule biosynthetic process  | 254       | 254         | 254      | 16                    |           | 0.00651   | 0.00651 |
| GO:0002520 | Immune system development                                  | 135       | 135         | 135      | 17                    | 1         | 0.00695   | 0.00695 |
| GO:0051173 | Positive regulation of nitrogen compound metabolic process | 253       | 253         | 253      | 18                    | 1         | 0.00754   | 0.00754 |
| GO:0071318 | Cellular response to ATP                                   | 3         | 3           | 3        | 19                    | 1         | 0.00762   | 0.00762 |
| GO:0006414 | Translational elongation                                   | 51        | 51          | 51       | 20                    | 1         | 0.00851   | 0.00851 |

The top 20 significant GO terms for the genes found to be differentially expressed and their corresponding annotation for Biological process (BP).

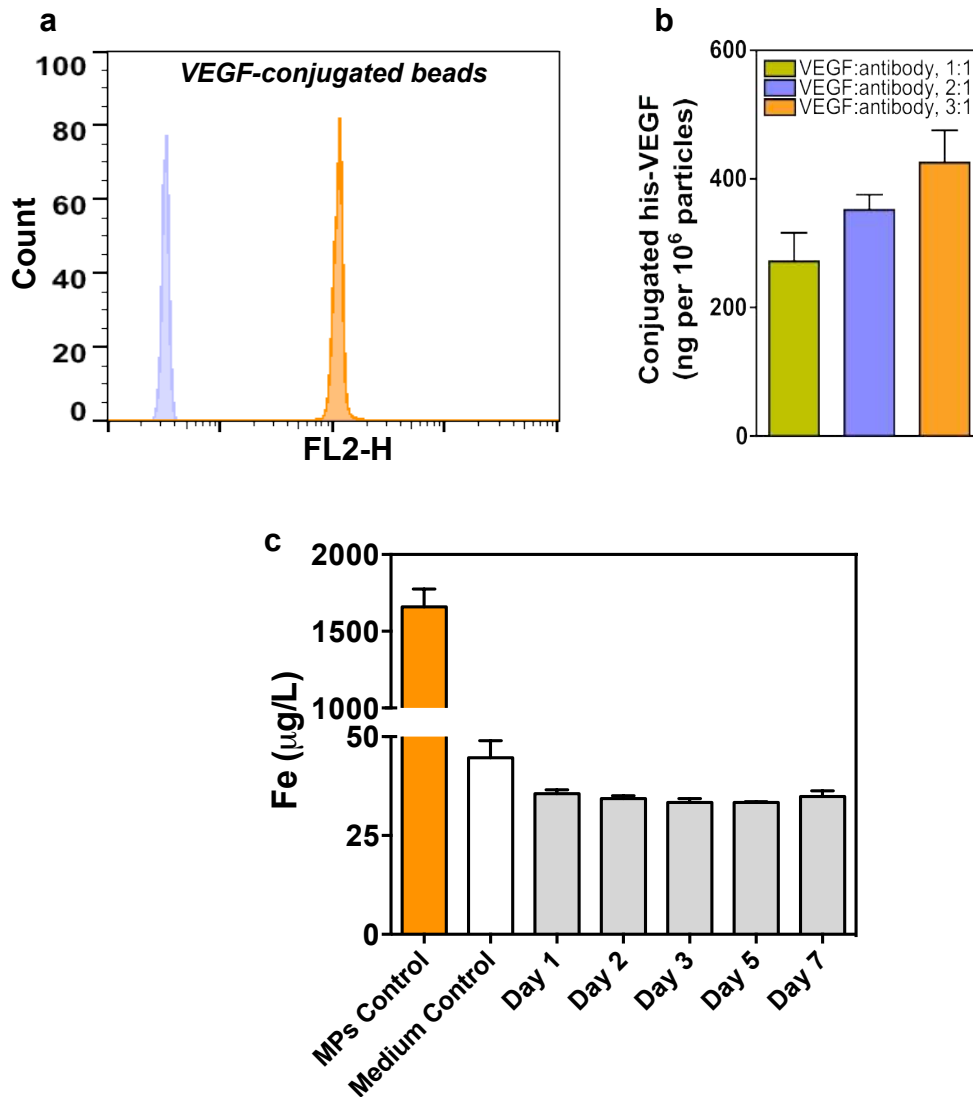

**Supplementary Figure 1. Characterization of MPs.** (a) Evaluation of VEGF conjugation onto MPs by flow cytometry. His-VEGF-conjugated MPs were stained with PE-conjugated anti-human VEGF antibody before flow cytometry characterization. Blue histogram indicates MPs without VEGF while orange histogram indicates VEGF-coated microparticles. (b) Amount of VEGF conjugated to microparticles: effect of the initial ratio of his-VEGF and anti-his-VEGF antibody. The immobilization of his-VEGF was quantified by ELISA measurements. Values are given as average  $\pm$  SEM (n=4-8). (c) Release of iron from microparticles up to 7 days as determined by ICP-MS analyses. Microparticles (MPs Control) and EGM-2 (Medium Control) were used as controls. Values are given as average  $\pm$  SEM (n=3).



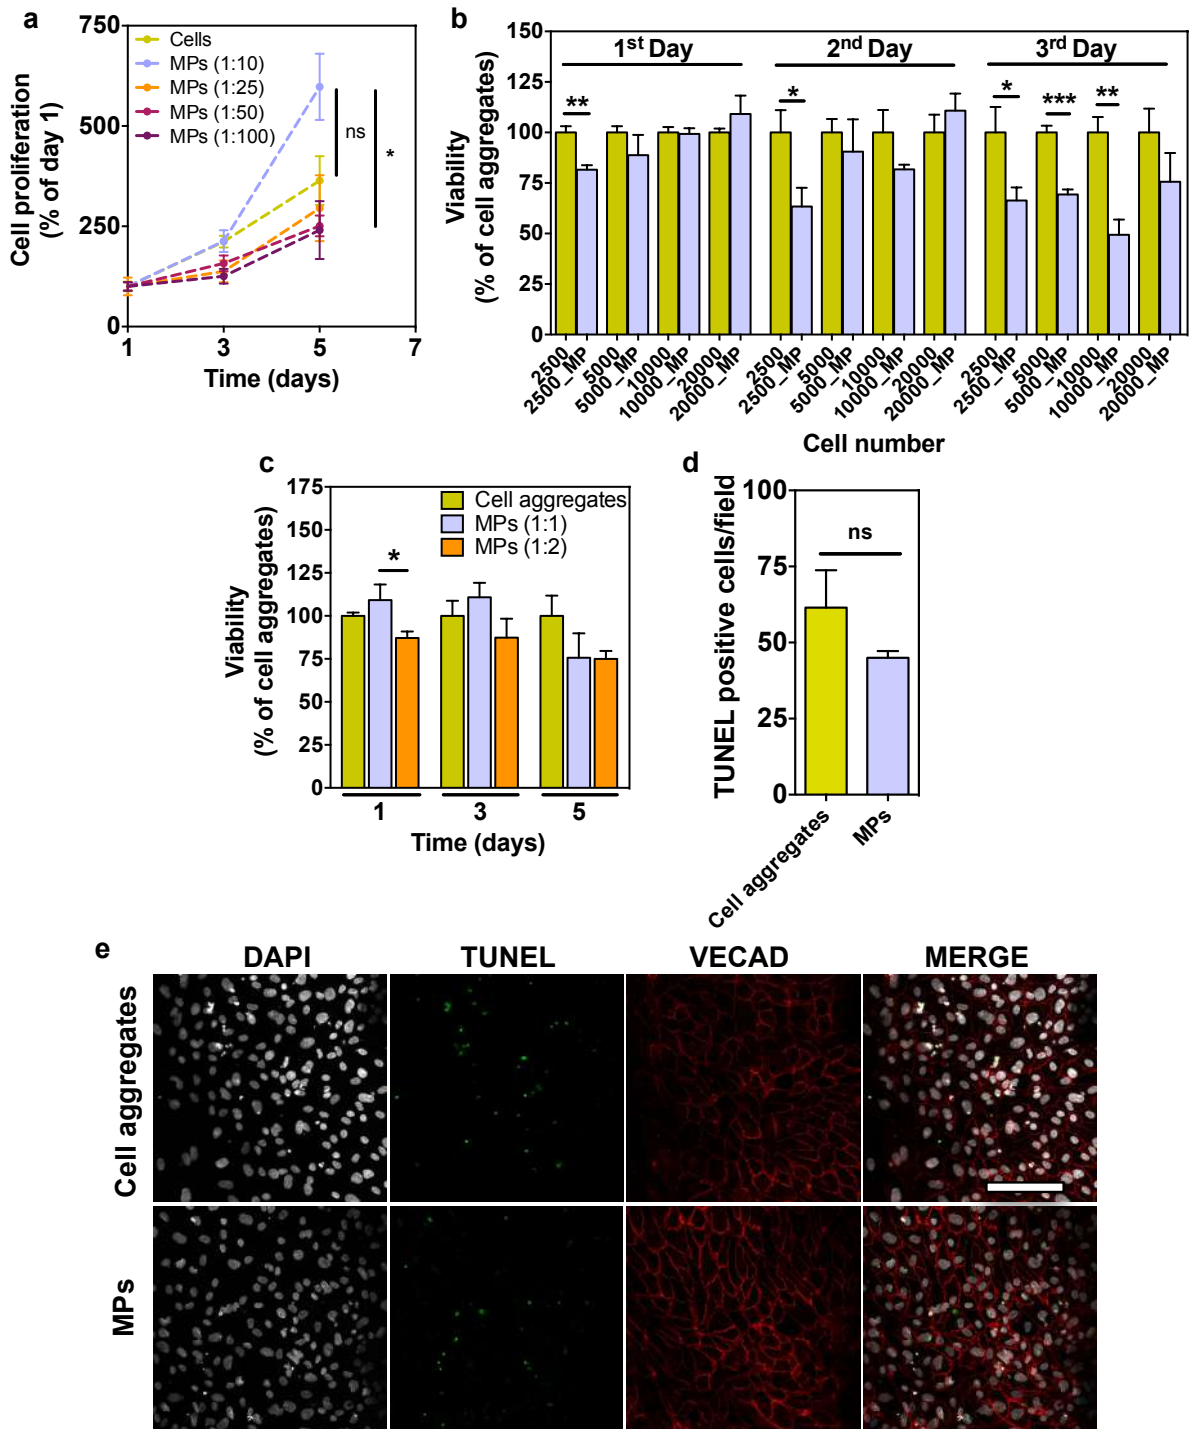

**Supplementary Figure 2. MP cytotoxicity evaluation.** (a) OEPCs cultured in monolayer were treated with different ratios of MPs (1:10, 1:25, 1:50, 1:100 cell:MP ratio) up to 5 days. Compared to cell aggregates, higher cell:MP ratios were used due to the fact that cell-bead interaction is lower in monolayer cultures. WST-1 was used to follow kinetics of cell proliferation. (b) Viability of OEPCs in cell aggregates having variable cell number. Different numbers of OEPCs (2,500-20,000 cells/aggregate) were seeded as hanging drops and the viability of the cells was evaluated up to 3 days. (c) Viability of OEPCs in cell aggregates having 1:1 and 1:2 cell:MP ratios. 20,000 cells were used per cell aggregate. (d) OEPC apoptosis as quantified by TUNEL assay. Cell aggregates (20,000 cells with a 1:1 cell:MP ratio) were cultured for 2 days before analyses. The number of TUNEL positive cells per field

was quantified. (e) Representative images of TUNEL staining. Scale bar corresponds to 50  $\mu\text{m}$ . The values in (a-d) are given as average  $\pm$  SEM for 4-6 different samples for each group.  $P \leq 0.05$  (\*),  $P \leq 0.01$  (\*\*),  $P \leq 0.001$  (\*\*\*). In (a) and (c), one-way Anova followed by a Bonferroni post-test was used for statistical analyses. In (b) and (d), unpaired *t-test* was performed between cell aggregates and cell aggregates containing MPs.

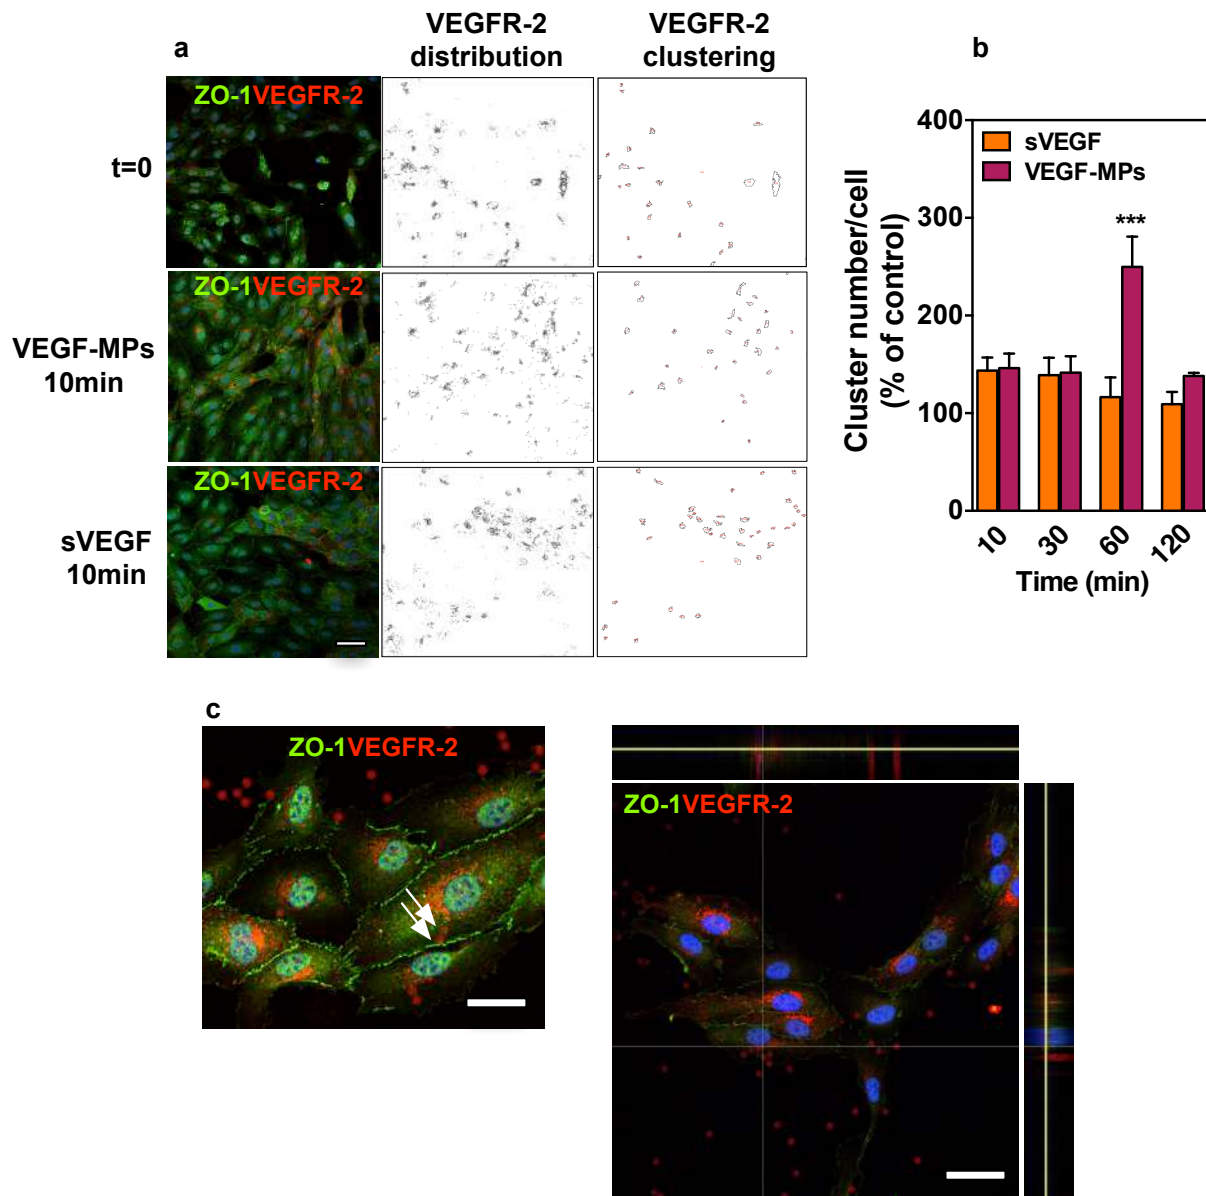

**Supplementary Figure 3. VEGF-MPs internalization and VEGFR-2 clustering.** OEPCs cultured in monolayer were treated with VEGF-MPs (1:2, cell:VEGF-MP ratio) or with same amount of sVEGF for different time points (i.e. 10, 30, 60, 120 min). VEGFR-2 clustering was quantified by confocal microscopy after cell fixation and immunostaining. (a) Representative confocal microscopy images of receptor clustering and analyses. Black and white images prepared by ImageJ were used for quantification of VEGFR-2 clustering. Time zero images were used to determine the threshold of particle size. Cell numbers in each image were calculated using DAPI stainings to normalize the results (cluster/cell). (b) Quantification of VEGFR-2 clustering. Values are average  $\pm$  SEM. Images from 3 samples in each group were used in the analysis. Unpaired *t*-test was performed between sVEGF and VEGF-MPs groups for statistical analysis.  $P \leq 0.001$  (\*\*\*). (c) Representative confocal microscopy images showing the internalization of VEGF-MPs after 2 h. OEPCs cultured in monolayer were treated with VEGF-MPs (1:2, cell:VEGF-MP ratio) for 2 h. VEGF-MPs internalization was quantified by confocal microscopy after cell fixation and immunostaining. Arrows indicate intracellular MPs. Scale bar corresponds to 20  $\mu$ m.

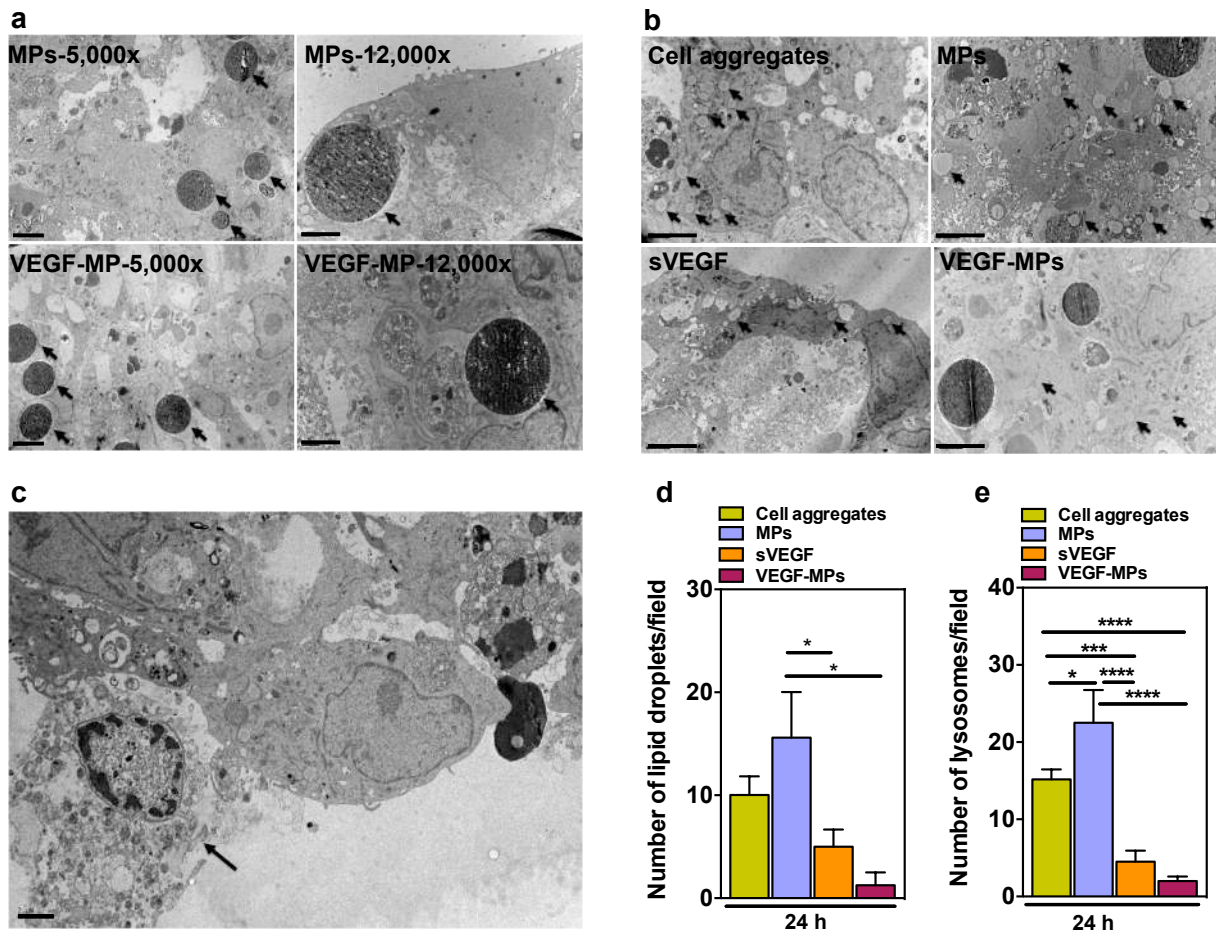

**Supplementary Figure 4. Ultrastructural analysis of OEPC aggregates.** (a) Transmission electron micrographs of OEPC aggregates containing blank MPs or VEGF-MPs showing the internalization of MPs by the cells after 24 h (Scale bars: 4  $\mu\text{m}$  for 5,000 $\times$  magnification; 2  $\mu\text{m}$  for 12,000 $\times$  magnification; arrows indicate MPs with the size of 4.5  $\mu\text{m}$ ). (b) The OEPC aggregates containing soluble (sVEGF) or immobilized VEGF (VEGF-MPs) show lower formation of cellular stress-related lipid droplets than control groups (cell aggregates) or blank MPs (Scale bars: 4  $\mu\text{m}$ ; magnification: 8,000 $\times$ ; time point: 24 h; arrows indicate lipid droplets). (c) Control group clearly shows necrotic cells in OEPC aggregates (Scale bar: 2  $\mu\text{m}$ ; magnification: 6,000 $\times$ ; time point: 24 h; arrow indicates necrotic cell in EC aggregate). (d-e) Quantification of lipid droplets (d) and lysosomes (e) in OEPC aggregates for different experimental conditions. The countings were performed using TEM photographs with 12,000 $\times$  magnifications. Values are average  $\pm$  SEM,  $n=3-8$ . For statistical analysis, one-way Anova followed by a Bonferroni post-test was used.  $P \leq 0.05$  (\*),  $P \leq 0.01$  (\*\*),  $P \leq 0.001$  (\*\*\*) and  $P \leq 0.0001$  (\*\*\*\*).

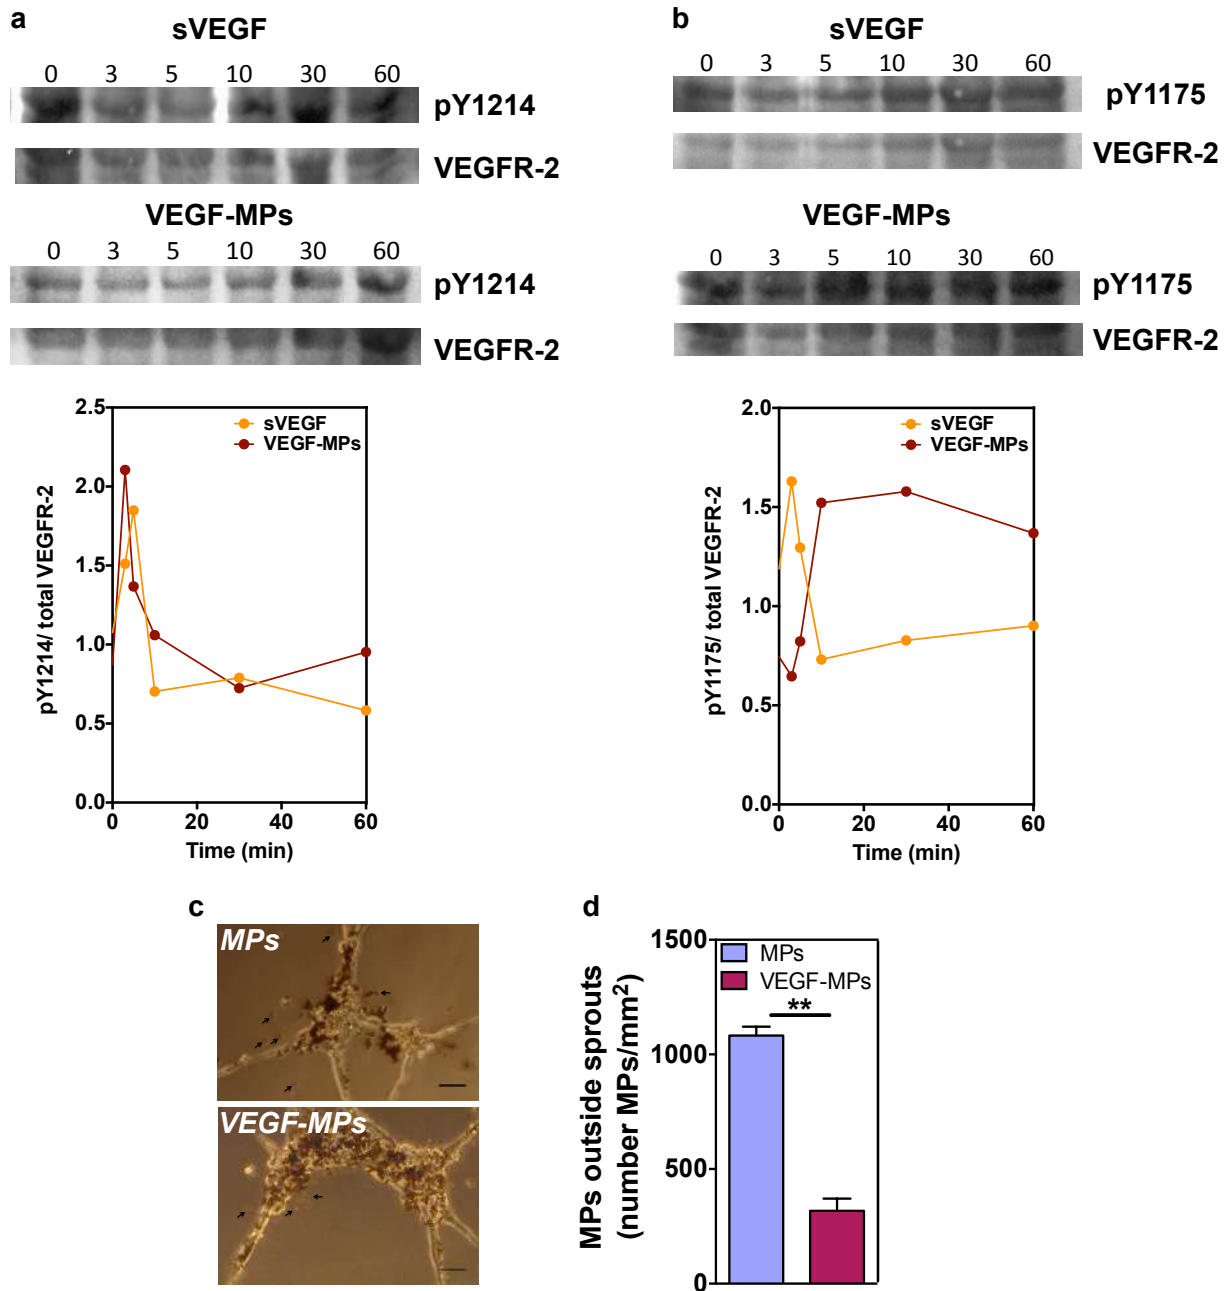

**Supplementary Figure 5. Bioactivity of sVEGF and VEGF-MPs in OEPCs.** (a-b) VEGFR-2 tyrosine phosphorylation induced by sVEGF or VEGF-MPs. OEPCs were aggregated up to 60 min and then lyzed. (c-d) VEGF-MPs and MPs interaction with OEPCs when seeded on Matrigel. (c) VEGF-MPs strongly interact with OEPC cord-like structures on Matrigel while blank MPs tend to aggregate and not to interact with cells. Arrows show the MPs that are not interacting with cells. Bar corresponds to 50  $\mu$ m. (d) Quantification of non-interacting MPs. Values are average  $\pm$  SEM, n=2 images/group were used for the calculations. The statistical analysis was performed using unpaired *t*-test.  $P \leq 0.01$  (\*\*).

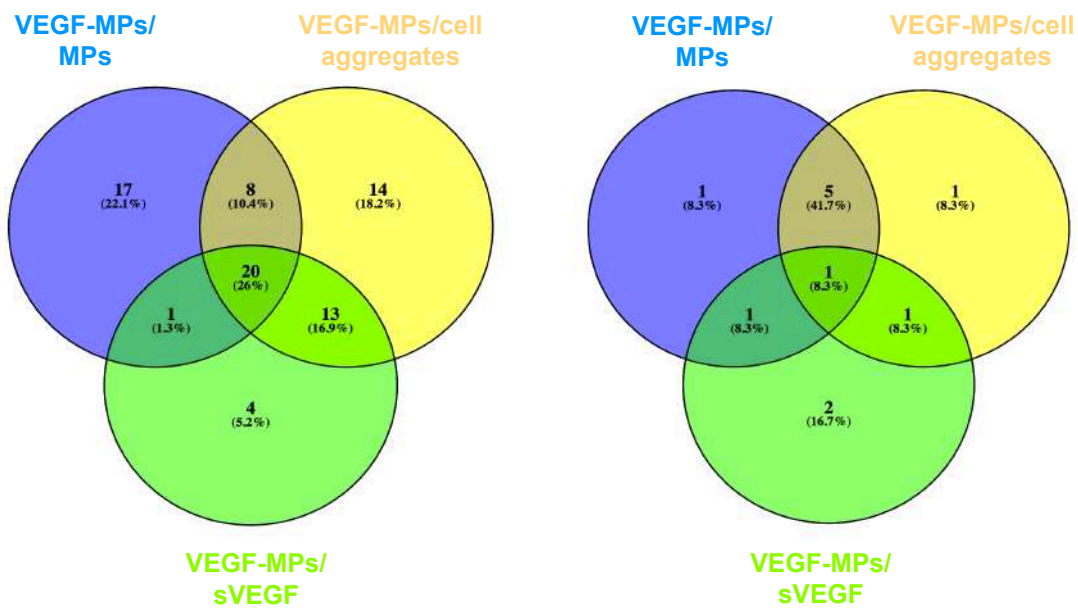

**Common downregulated miRNAs:** hsa-miR-217, hsa-miR-216a, hsa-miR-503, hsa-miR-31, hsa-miR-100, hsa-miR-24, hsa-miR-23a, hsa-miR-27a, hsa-miR-30a, hsa-miR-151-5p, hsa-miR-29c, hsa-miR-20a, hsa-miR-17, hsa-miR-106b, hsa-let-7f, hsa-miR-21, hsa-miR-126, hsa-miR-374a, hsa-let-7g, hsa-miR-126\*

**Common upregulated miRNAs:** hsa-miR-576-5p

**Supplementary Figure 6. miRNA microarray analysis.** The common miRNAs downregulated or upregulated in VEGF-MP group compared with cell aggregates, MPs and sVEGF experimental groups were determined using VENNY software and presented in the figure.





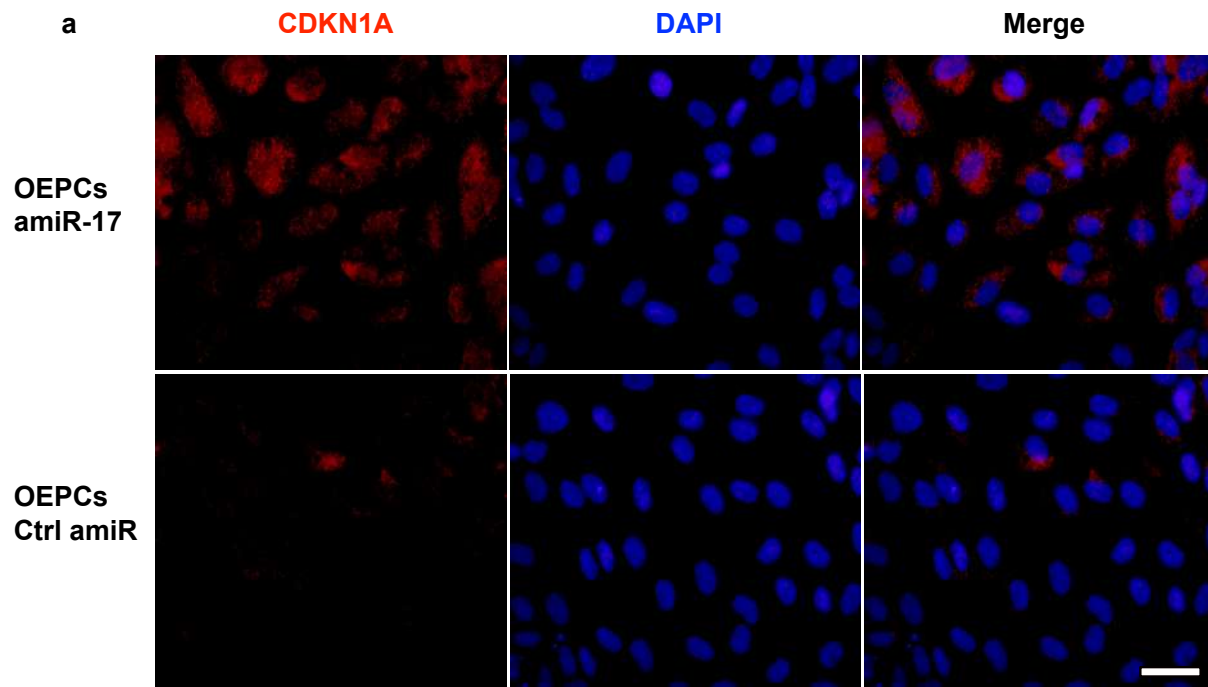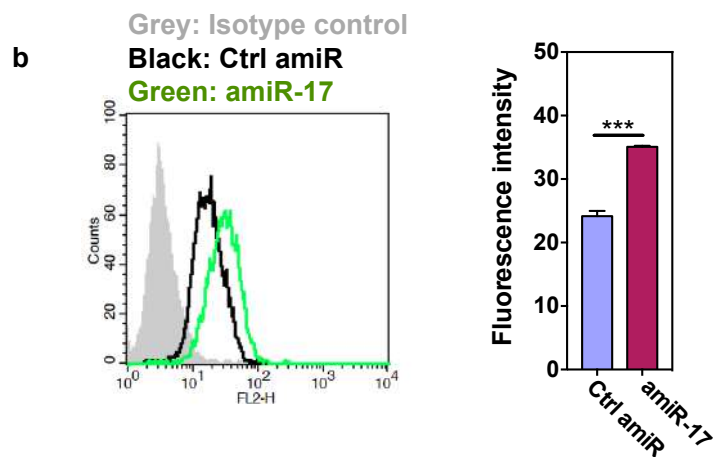

**Supplementary Figure 8. CDKN1A expression in OEPCs after transfection with *amiR-17*.** OEPCs were transfected with 50 nM *amiR-17* or 50 nM control amiR for 48 h. After additional incubation in hypoxia (0.1% O<sub>2</sub>) for 24 h, they were stained with mouse anti-human CDKN1A antibody. (a) Fluorescence microscopy results. CDKN1A increased at protein level for OEPCs transfected with *amiR-17*. Scale bar corresponds to 20 μm. (b) Flow cytometry results. Results are average ± SEM, n=3. For statistical analysis, unpaired *t*-test was performed.  $P \leq 0.001$  (\*\*\*).



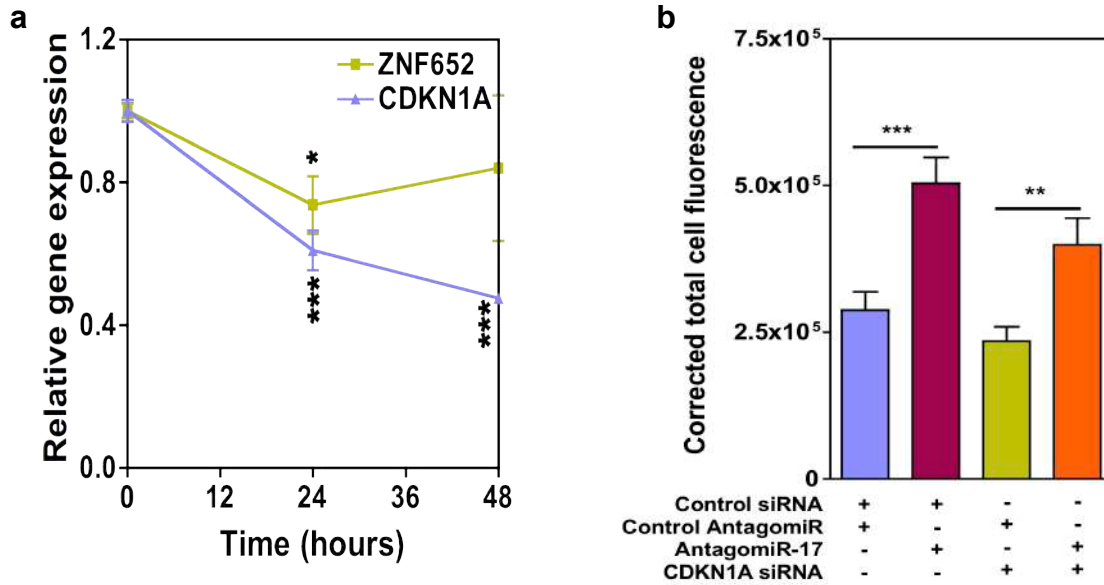

**Supplementary Figure 9. Silencing of *miR-17* targets.** (a) qRT-PCR results confirm the downregulation of gene targets (i.e. *ZNF652* and *CDKN1A*) after the treatment with siRNAs against human *ZNF652* and *CDKN1A*. (b) Quantification of *CDKN1A* silencing at protein level (results obtained by image analyses of confocal microscopy images). Corrected total cell fluorescence was calculated according to the equation: Integrated density – (Area of selected cell × Mean fluorescence of background readings). Results were given as average ± SEM. n=4 in (a) and n=3 in (b). Unpaired *t*-test was used for statistical analysis.  $P \leq 0.05$  (\*),  $P \leq 0.01$  (\*\*),  $P \leq 0.001$  (\*\*\*)

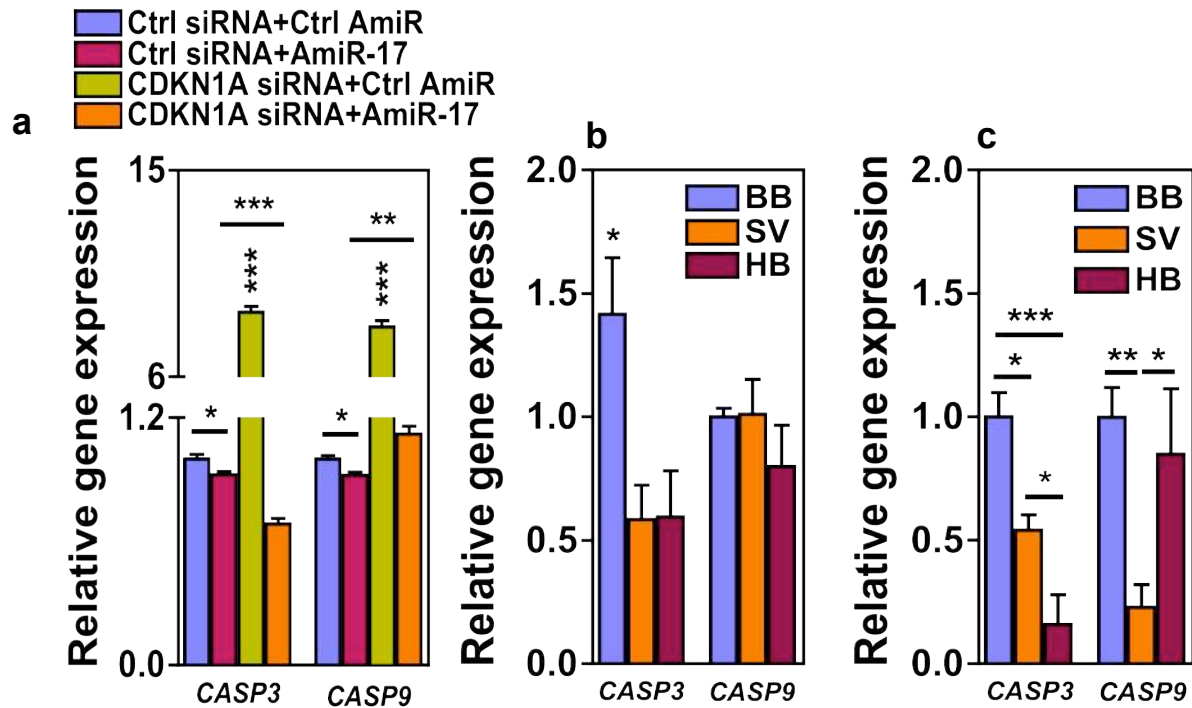

**Supplementary Figure 10. Expression of *CASP3* and *CASP9* transcripts in OEPCs.** (a) Silencing of gene target *CDKN1A* by siRNA for 48 h showed an increase in the expression of *CASP3* around 10 times and *CASP9* around 8 times. (b-c) Conjugated VEGF decreases the expression of *CASP3* and *CASP9* both *in vitro* (b) and *in vivo* (c) (subcutaneous injections, after 24 h). U6 was used to normalize the results. Values are given as average  $\pm$  SEM, n=4. For statistical analysis, one-way Anova followed by a Bonferroni post-test was used.  $P \leq 0.05$  (\*),  $P \leq 0.01$  (\*\*) and  $P \leq 0.001$  (\*\*\*). The asterisks on CDKN1A siRNA+Ctrl AmiR group (\*\*\*) in (a) indicate that in this group, the increase in *CASP3* and *CASP9* is statistically significant ( $P \leq 0.001$ ) compared with all other groups in the graph.

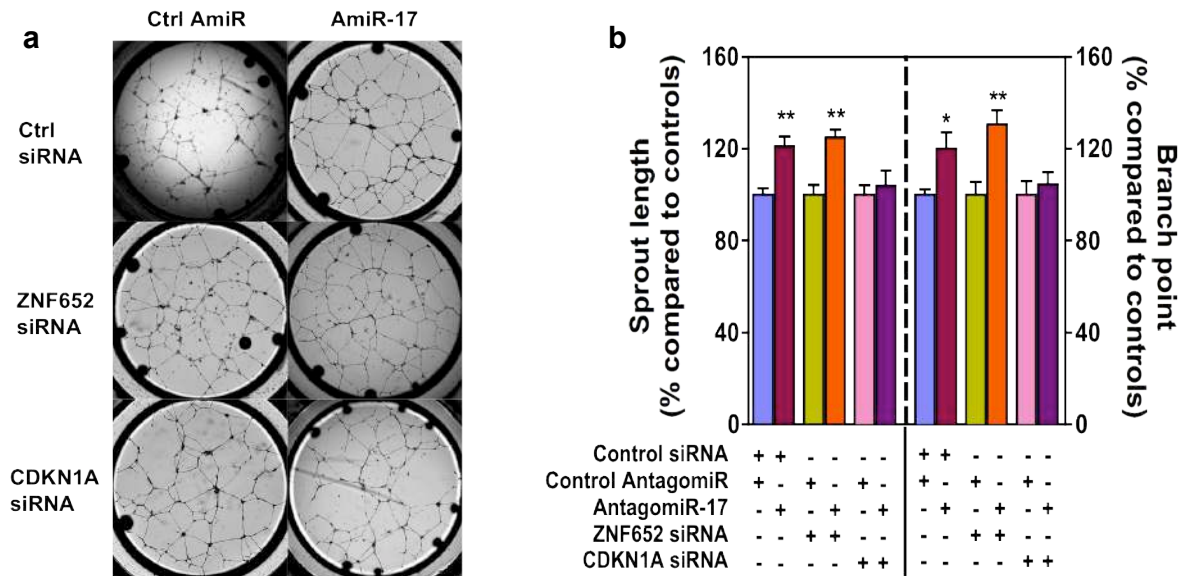

**Supplementary Figure 11. Silencing of *miR-17* target *CDKN1A* reduces sprouting of OEPCs after treatment with *amiR-17*.** OEPCs were double-transfected with 40 nM siRNAs (i.e. control siRNA, *ZNF652* siRNA or *CDKN1A* siRNA) and 50 nM antagomiRs (control amiR or *amiR-17*) for 48 h and incubated under hypoxia conditions (0.1% O<sub>2</sub>) in starvation medium (EGM-2 without VEGF and with 1% FBS). (a) Representative light microscopy images of all experimental groups. (b) Effect of silencing *ZNF652* or *CDKN1A* in the angiogenic effect of *amiR-17*. *ZNF652* siRNA-treatment did not impair angiogenesis potential of *amiR-17*, while *CDKN1A* siRNA-treatment decreased significantly the effect of *amiR-17*. The values are normalized to their control groups and given as average  $\pm$  SEM (n=5). Unpaired *t*-test was used for statistical analysis.  $P \leq 0.05$  (\*),  $P \leq 0.01$  (\*\*). The sprout photos were taken using IN Cell Analyzer from GE Healthcare with 2 $\times$  objective and analyzed in ImageJ.

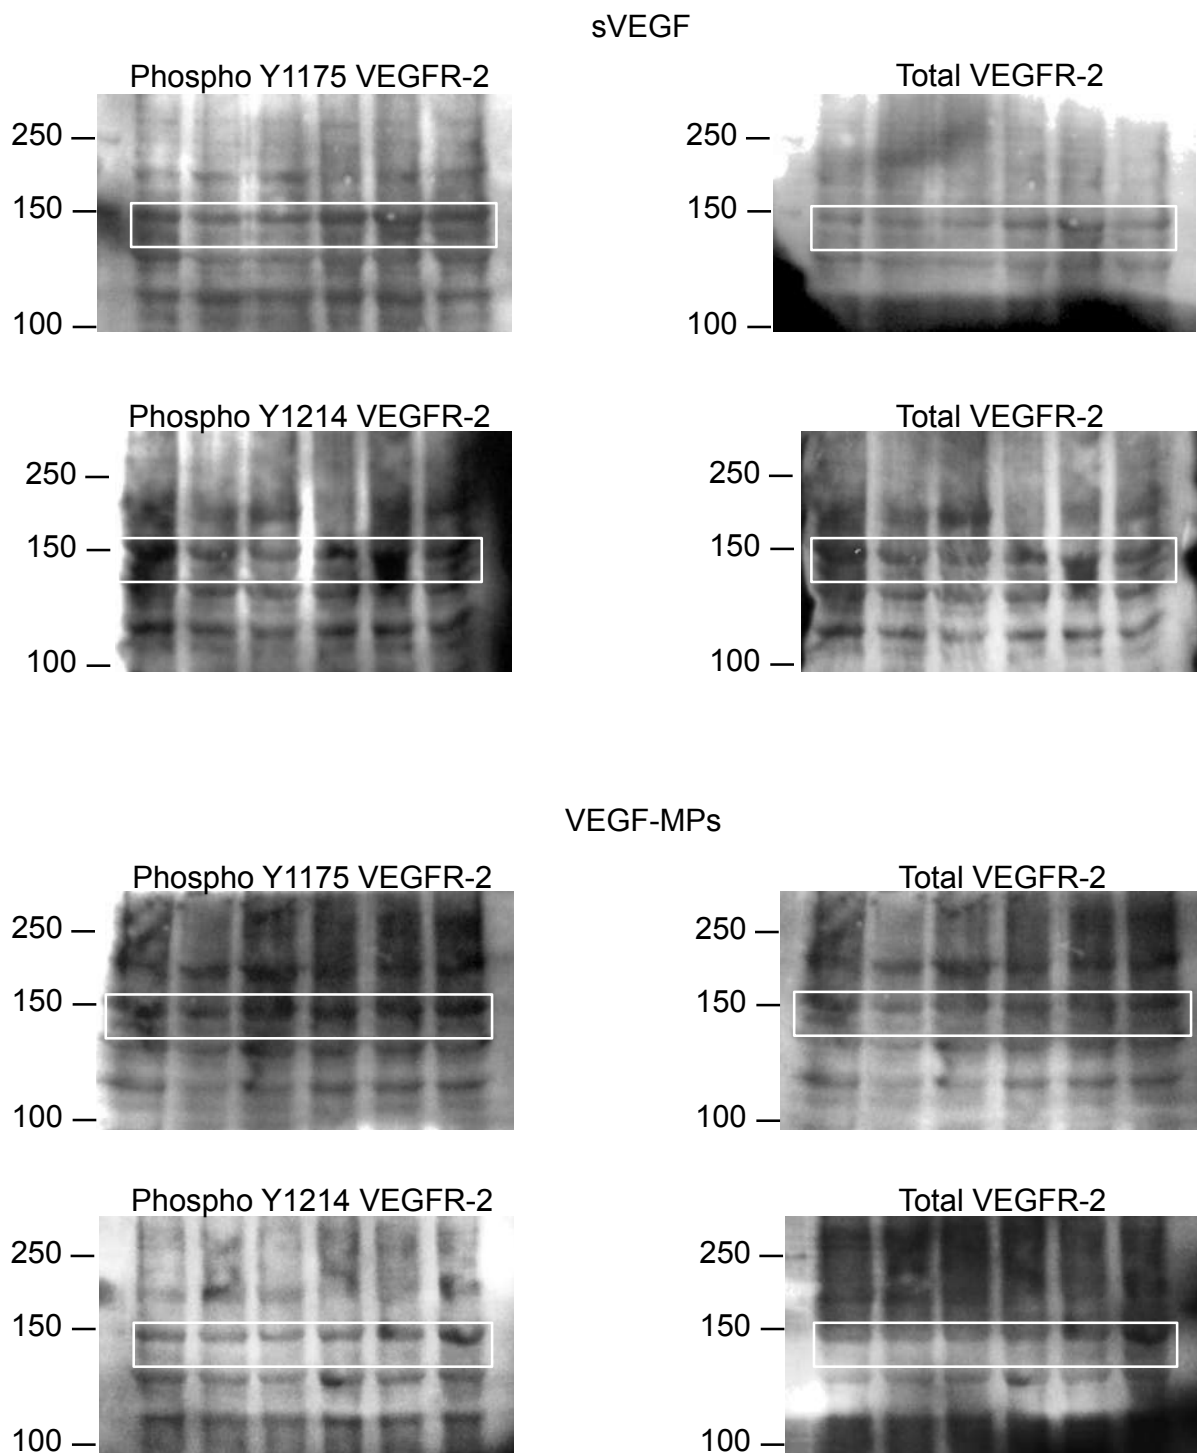

**Supplementary Figure 12. Full gel images for WB.** Uncropped images of the gels for Supplementary Fig. 5a-b. White rectangles indicate the bands used for the calculations.

## Supplementary Reference

1. Betel D, Wilson M, Gabow A, Marks DS, Sander C. The microRNA.org resource: targets and expression. *Nucleic Acids Res* **36**, D149-153 (2008).
